# Supplementary material for: A tough organohydrogel-based multiresponsive sensor for a triboelectric nanogenerator and supercapacitor toward wearable intelligent devices
Source: Royal Society of Chemistry journal article supplement (doi:10.1039/d2ta01503j), 2022-01-01
Supplement: d2ta01503j1.pdf [file d2ta01503j1.pdf]

*Supporting information*

**A tough organohydrogel-based multiresponsive sensor for a  
triboelectric nanogenerator and supercapacitor toward  
wearable intelligent devices**

Kui Hu <sup>a</sup>, Zhipeng Zhao <sup>a</sup>, Yingyue Wang <sup>a</sup>, Longhuo Yu <sup>a</sup>, Kai Liu <sup>a,\*</sup>, Hui Wu <sup>a</sup>,

Liulian Huang <sup>a</sup>, Lihui Chen <sup>a</sup>, Yonghao Ni <sup>a,b</sup>

<sup>a</sup> College of Materials Engineering, Fujian Agriculture and Forestry University,  
Fuzhou, Fujian 350108, P. R. China

<sup>b</sup> Limerick Pulp and Paper Centre, Department of Chemical Engineering, University  
of New Brunswick, Fredericton, New Brunswick E3B5A3, Canada

Corresponding author:

**Kai Liu**

College of Materials Engineering, Fujian Agriculture and Forestry University, Fuzhou,  
Fujian 350108, P. R. China.

E-mail: liuk1103@163.com

**This section includes:**

**Figure S1.** Mapping images of Na and Ti elements in the MGCSP organohydrogel.

**Figure S2.** Relative resistance changes of the MGCSP organohydrogel to the applied strain.

**Figure S3.** Relative resistance changes of the MGCSP organohydrogel-based sensor for loading of 100%, 200%, and 300% strain, respectively.

**Figure S4.** The formation of the conductive path constructed by MX-GO nanocomposites in the MGCSP organohydrogel.

**Figure S5.** Relative resistance changes of the MGCSP organohydrogel at repeated 30% strain loading for 250 cycles.

**Figure S6.** Water loss rate of the MGCSP organohydrogel with and without EG under constant temperature (25 °C) and relative humidity (52%) conditions.

**Figure S7.** Relative resistance changes induced by the bending of the wrist at different flexion angles measured by the MGCSP organohydrogel-based sensor after storage at 25 °C for 32 h.

**Figure S8.** Evaluation of biocompatibility on NIH-3T3 cells cultured with different concentrations of extracts of the MGCSP organohydrogels.

**Figure S9.** The measurement approach (a) and results (b) of the response time and detection limit of the MGCSP organohydrogel .

**Figure S10.** The conductivities of the MGCSP organohydrogel at different temperatures from -20 to 80 °C.

**Figure S11.** Capacitance retention of the supercapacitor after 1500 charging and discharging cycles at current density of 1 A·g<sup>-1</sup>.

**Table S1.** The compositions of P, SP, CSP, and MGCSP organohydrogel.

**Table S2.** The percentage of C-C, C-O, and -COO from the C 1s peaks of the dried MXene and MXene-GO nanocomposites XPS spectra.

**Table S3.** Comparison of GFs between the MGCSP organohydrogel and recently reported hydrogels.

**Table S4.** Comparison of  $V_{OC}$ ,  $I_{SC}$  and  $Q_{SC}$  between the MGCSP organohydrogel-based TENG and the recently reported TENGs.

**Movie S1.** The blue LEDs were lit up by continuous hand clapping of the MGCSP

organohydrogel-based TENG.

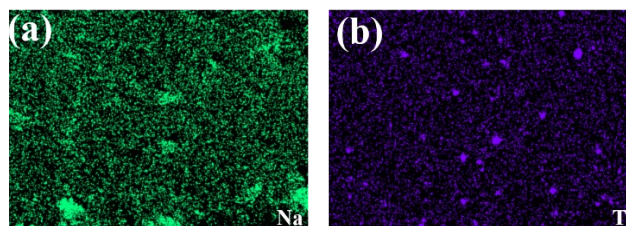

**Figure S1.** Mapping images of Na and Ti elements in the MGCSP organohydrogel.

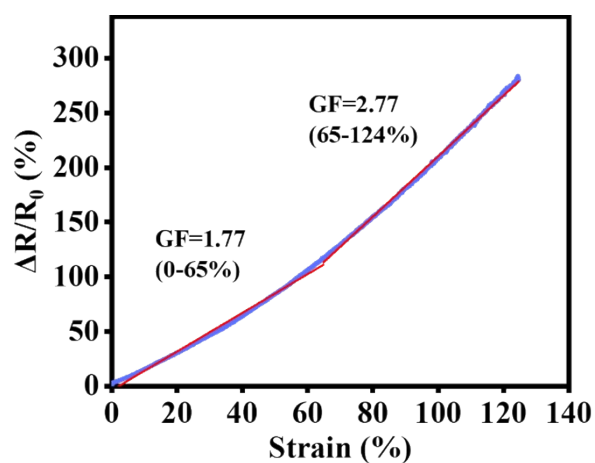

**Figure S2.** Relative resistance changes of the MGCSP organohydrogel to the applied strain.

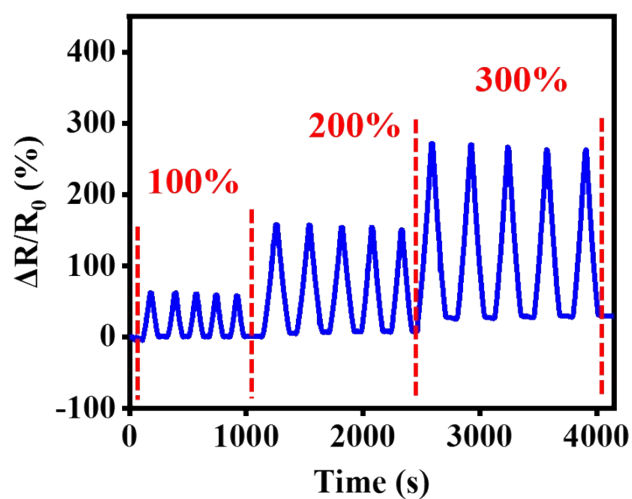

**Figure S3.** Relative resistance changes of the MGCSP organohydrogel-based sensor for loading of 100%, 200%, and 300% strain, respectively.

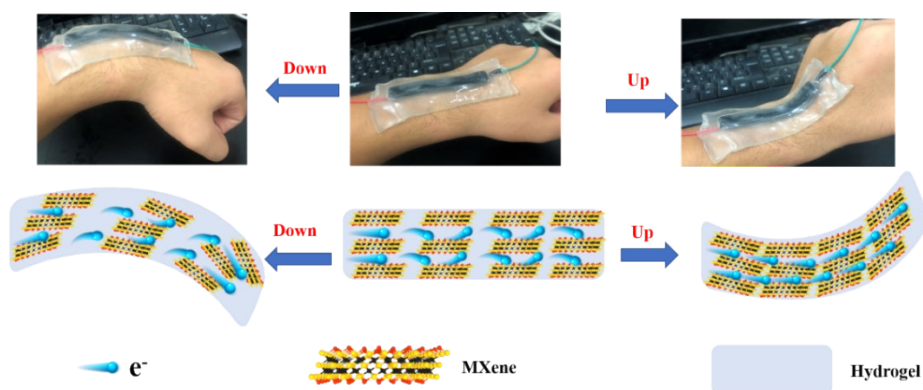

**Figure S4.** The formation of the conductive path constructed by MX-GO nanocomposites in the MGCSP organohydrogel.

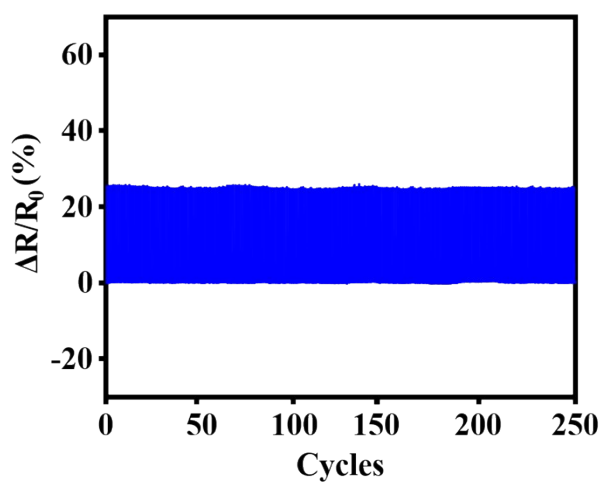

**Figure S5.** Relative resistance changes of the MGCSP organohydrogel at repeated 30% strain loading for 250 cycles.

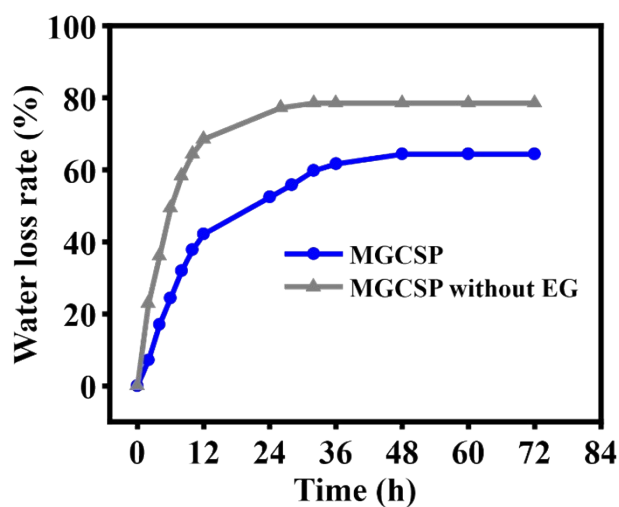

**Figure S6.** Water loss rate of the MGCSP organohydrogel with and without EG under constant temperature (25 °C) and relative humidity (52%) conditions.

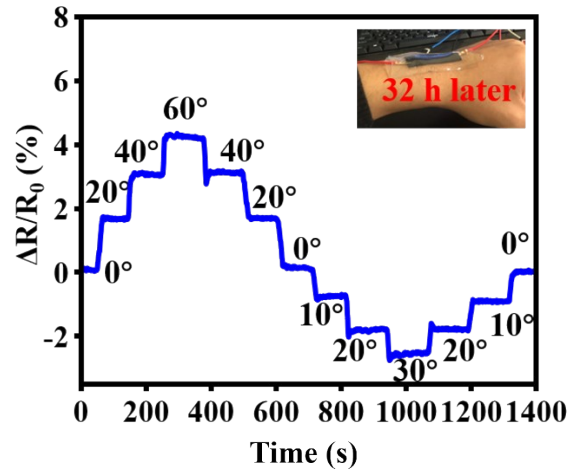

**Figure S7.** Relative resistance changes induced by the bending of the wrist at different flexion angles measured by the MGCSP organohydrogel-based sensor after storage at 25 °C for 32 h.

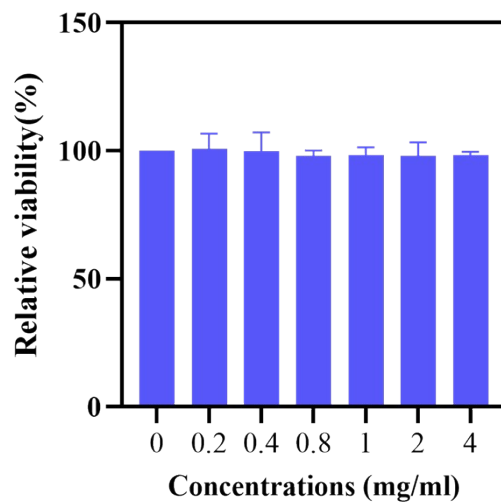

**Figure S8.** Evaluation of biocompatibility on NIH-3T3 cells cultured with different concentrations of extracts of the MGCSP organohydrogels.

The biocompatibility of the MGCSP organohydrogel on NIH 3T3 cells was evaluated by CCK-8 assay according to the literatures <sup>1,2</sup>, the relative viability was calculated by the following equation:

$$\text{Relative viability} = (A_{\text{sample}}) / (A_{\text{control}}) \times 100\%$$

where  $A_{\text{sample}}$  and  $A_{\text{control}}$  were the absorbances in different concentrations of extracts of the MGCSP organohydrogel and cell culture medium, respectively.

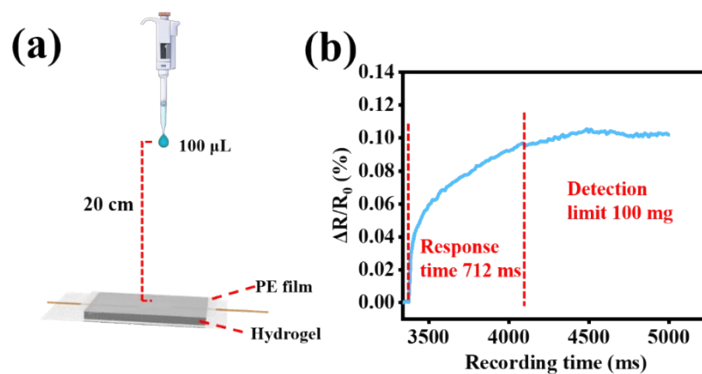

**Figure S9.** The measurement approach (a) and results (b) of the response time and detection limit of the MGCSP organohydrogel.

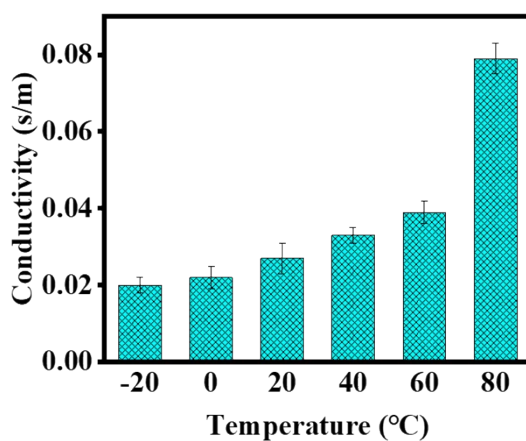

**Figure S10.** The conductivities of the MGCSP organohydrogel at different temperatures from -20 to 80 °C.

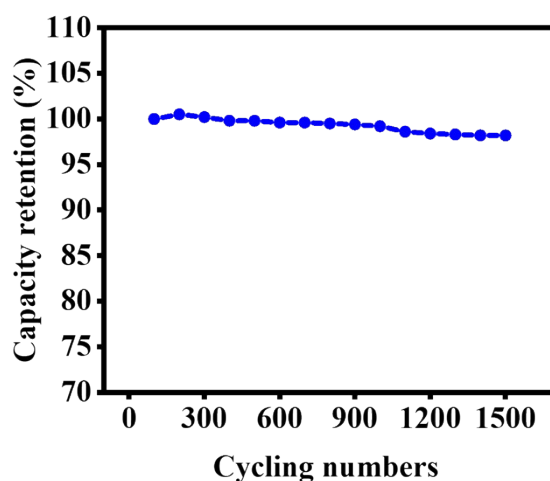

**Figure S11.** Capacitance retention of the supercapacitor after 1500 charging and discharging cycles at current density of  $1 \text{ A} \cdot \text{g}^{-1}$ .

**Table S1.** The compositions of P, SP, CSP, and MGCSP organohydrogel.

| Hydrogels | PVA<br>(g) | SA<br>(g) | H <sub>2</sub> O (g) | CNF (g) | MX-GO (g) | ethylene glycol (g) |
|-----------|------------|-----------|----------------------|---------|-----------|---------------------|
| P         | 12         | 0         | 40                   | 0       | 0         | 4                   |
| SP        | 12         | 0.4       | 40                   | 0       | 0         | 4                   |
| CSP       | 12         | 0.4       | 38                   | 2       | 0         | 4                   |
| MGCSP     | 12         | 0.4       | 38                   | 2       | 0.08      | 4                   |

**Table S2.** The percentage of C-C, C-O, and -COO from the C 1s peaks of the dried MXene and MXene-GO nanocomposites XPS spectra.

| Samples  | C-C (%) | C-O (%) | -COO (%) |
|----------|---------|---------|----------|
| MXene    | 33.20   | 3.39    | ---      |
| MXene-GO | 46.59   | 20.23   | 3.65     |

**Table S3.** Comparison of GFs between the MGCSP organohydrogel and recently reported hydrogels.

| Hydrogels                | Conductive component    | Gauge factor                                 | Reference        |
|--------------------------|-------------------------|----------------------------------------------|------------------|
| PVA/Polyvinylpyrrolidone | Fe <sup>3+</sup>        | 0.478 (200%)                                 | 3                |
| PAAm                     | LiCl                    | 0.84 (40%)                                   | 4                |
| PAA                      | Al <sup>3+</sup>        | 0.76 (75%)                                   | 5                |
| PAA/PVA                  | Fe <sup>3+</sup> /F-CNT | 1.16 (101%)                                  | 6                |
| PVA/HPC                  | NaCl                    | 0.984 (100%)                                 | 7                |
| PVA/SA                   | GO-MXene                | <b>1.77 (0-65%)</b><br><b>2.77 (65-124%)</b> | <b>This work</b> |

**Table S4.** Comparison of  $V_{OC}$ ,  $I_{SC}$  and  $Q_{SC}$  between the MGCSP organohydrogel-based TENG and the recently reported TENGs.

| <b>Conductive materials</b> | <b>Friction materials</b> | <b>VOC (V)</b> | <b>ISC (<math>\mu</math>A)</b> | <b>QSC (nC)</b> | <b>Contact area</b>            | <b>Reference</b> |
|-----------------------------|---------------------------|----------------|--------------------------------|-----------------|--------------------------------|------------------|
| PVA/PEI                     | PDMS/Skin                 | 70             | 12.08                          | 22              | 2.0×2.0 cm <sup>-2</sup>       | 8                |
| PVA/PDAP/MWCNT              | Silicone rubber/Skin      | 95             | 1.5                            | 32              | 30×30 mm <sup>-2</sup>         | 9                |
| PAAm-alginate hydrogel      | PDMS/Skin                 | 11.2           | 0.07                           | 3.74            | 2.5×2.5 cm <sup>-2</sup>       | 10               |
| HTS-c-hydrogel              | HTS-PDMS/Skin             | 6.5            | 0.05                           | 0.75            | 4.0×4.0 cm <sup>-2</sup>       | 11               |
| Cellulose/PVA               | VHB/Nylon                 | 41             | 0.5                            | 15              | 1.0×1.5 cm <sup>-2</sup>       | 12               |
| <b>MGCSP organohydrogel</b> | <b>PDMS/Skin</b>          | <b>145</b>     | <b>8.7</b>                     | <b>42.9</b>     | <b>4.0×4.0 cm<sup>-2</sup></b> | <b>This work</b> |



## References

1. G. Tao, Y. Wang, R. Cai, H. Chang, K. Song, H. Zuo, P. Zhao, Q. Xia and H. He, *Mater Sci Eng C Mater Biol Appl*, 2019, **101**, 341-351.
2. H. Wei, Z. Wang, H. Zhang, Y. Huang, Z. Wang, Y. Zhou, B. B. Xu, S. Halila and J. Chen, *Chemistry of Materials*, 2021, **33**, 6731-6742.
3. Y. J. Liu, W. T. Cao, M. G. Ma and P. Wan, *ACS Appl Mater Interfaces*, 2017, **9**, 25559-25570.
4. K. Tian, J. Bae, S. E. Bakarich, C. Yang, R. D. Gately, G. M. Spinks, M. In Het Panhuis, Z. Suo and J. J. Vlassak, *Adv Mater*, 2017, **29**, 1604827.
5. C. Shao, M. Wang, L. Meng, H. Chang, B. Wang, F. Xu, J. Yang and P. Wan, *Chemistry of Materials*, 2018, **30**, 3110-3121.
6. G. Ge, W. Yuan, W. Zhao, Y. Lu, Y. Zhang, W. Wang, P. Chen, W. Huang, W. Si and X. Dong, *Journal of Materials Chemistry A*, 2019, **7**, 5949-5956.
7. Y. Zhou, C. Wan, Y. Yang, H. Yang, S. Wang, Z. Dai, K. Ji, H. Jiang, X. Chen and Y. Long, *Advanced Functional Materials*, 2019, **29**, 1806220.
8. L. Wang and W. A. Daoud, *Advanced Energy Materials*, 2018, 1803183.
9. Q. Guan, G. Lin, Y. Gong, J. Wang, W. Tan, D. Bao, Y. Liu, Z. You, X. Sun, Z. Wen and Y. Pan, *Journal of Materials Chemistry A*, 2019, **7**, 13948-13955.
10. T. Liu, M. Liu, S. Dou, J. Sun, Z. Cong, C. Jiang, C. Du, X. Pu, W. Hu and Z. L. Wang, *ACS nano*, 2018, **12**, 2818-2826.
11. Y. C. Lai, H. M. Wu, H. C. Lin, C. L. Chang, H. H. Chou, Y. C. Hsiao and Y. C. Wu, *Advanced Functional Materials*, 2019, **29**, 1904626.
12. Y. Wang, L. Zhang and A. Lu, *Journal of Materials Chemistry A*, 2020, **8**, 13935-13941.
